# Supplementary material
Source: PubMed Central journal article supplement (PMC6583020)
Supplement: jamaoncol-5-1036-s002.pdf [file jamaoncol-5-1036-s002.pdf]

## Supplementary Online Content

Lehman CD, Gatsonis C, Romanoff J, et al. Association of magnetic resonance imaging and a 12-gene expression assay with breast ductal carcinoma in situ treatment. *JAMA Oncol*. Published online January 17, 2019. doi:10.1001/jamaoncol.2018.6269

**eFigure.** MRI Findings Management Flowchart

**eTable.** Baseline Demographics and Diagnostic Core Needle Biopsy and Mammography Characteristics

This supplementary material has been provided by the authors to give readers additional information about their work.

**eFigure.** MRI Findings Management Flowchart

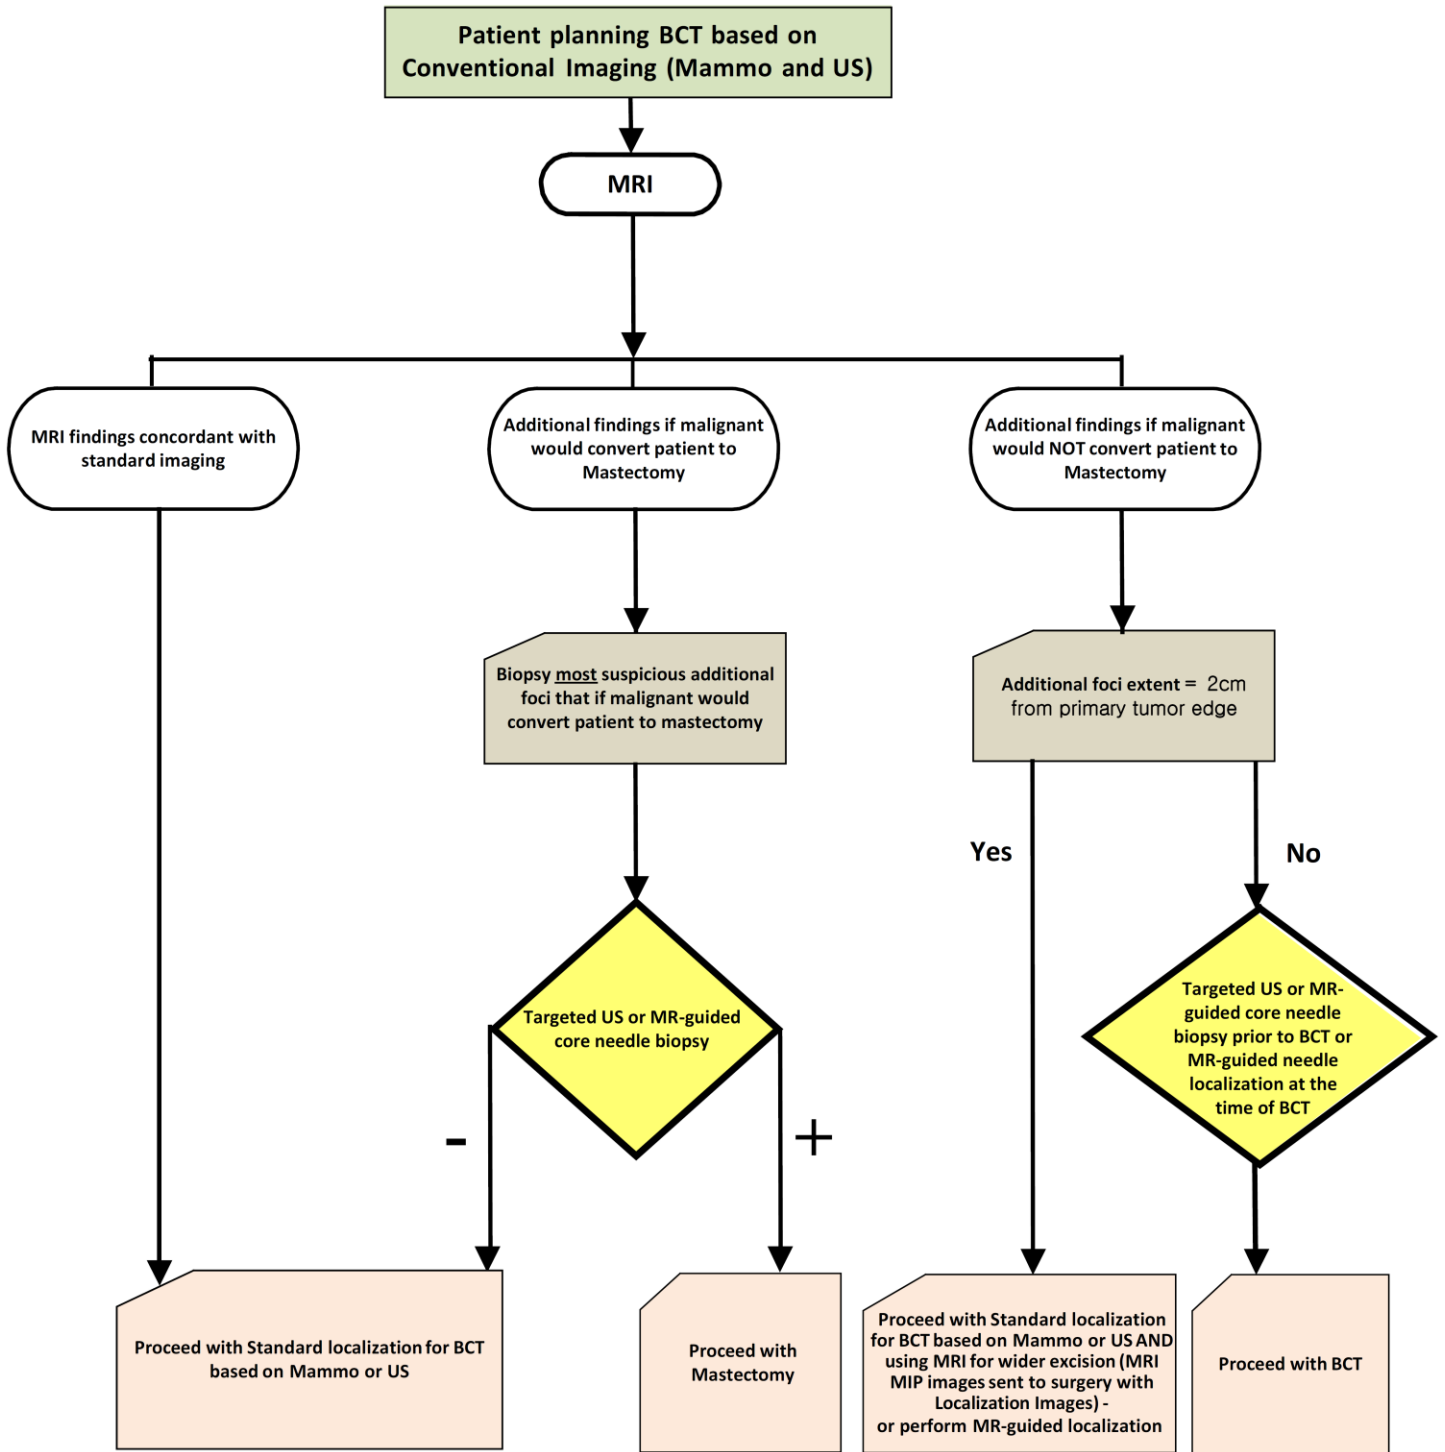

**eTable. Baseline Demographics and Diagnostic Core Needle Biopsy and Mammography Characteristics**

|                                                                | All enrolled<br>(n = 368) | Pure DCIS<br>Pre-operative MRI<br>Final surgery known<br>(n = 339) | Radiotherapy<br>recommendation<br>based on DCIS Score<br>(n = 171) |
|----------------------------------------------------------------|---------------------------|--------------------------------------------------------------------|--------------------------------------------------------------------|
| Age, median (range), years                                     | 59 (34, 87)               | 60 (34, 87)                                                        | 60 (36, 87)                                                        |
| Race, No. (%)                                                  |                           |                                                                    |                                                                    |
| African descent                                                | 54 (15)                   | 49 (14)                                                            | 23 (13)                                                            |
| European descent                                               | 283 (77)                  | 262 (77)                                                           | 137 (80)                                                           |
| Other                                                          | 31 (8)                    | 28 (8)                                                             | 11 (6)                                                             |
| Ethnicity, No. (%)                                             |                           |                                                                    |                                                                    |
| Hispanic/Latino                                                | 21 (6)                    | 21 (6)                                                             | 8 (5)                                                              |
| Not Hispanic/Latino                                            | 328 (89)                  | 302 (89)                                                           | 155 (91)                                                           |
| Not reported/Unknown                                           | 19 (5)                    | 16 (5)                                                             | 8 (5)                                                              |
| Insurance status, No. (%)                                      |                           |                                                                    |                                                                    |
| Private insurance                                              | 281 (76)                  | 261 (77)                                                           | 125 (73)                                                           |
| Medicare/Other government insurance                            | 68 (18)                   | 62 (18)                                                            | 41 (24)                                                            |
| Medicaid/Uninsured                                             | 19 (5)                    | 16 (5)                                                             | 5 (3)                                                              |
| DCIS grade, No. (%)                                            |                           |                                                                    |                                                                    |
| Low nuclear                                                    | 62 (17)                   | 54 (16)                                                            | 23 (13)                                                            |
| Intermediate nuclear                                           | 149 (40)                  | 136 (40)                                                           | 72 (42)                                                            |
| High nuclear <sup>a</sup>                                      | 144 (39)                  | 137 (40)                                                           | 72 (42)                                                            |
| Not reported/Unknown                                           | 13 (4)                    | 12 (4)                                                             | 4 (2)                                                              |
| ER status, No. (%)                                             |                           |                                                                    |                                                                    |
| Positive                                                       | 282 (77)                  | 258 (76)                                                           | 137 (80)                                                           |
| Negative                                                       | 48 (13)                   | 47 (14)                                                            | 19 (11)                                                            |
| Unknown                                                        | 38 (10)                   | 34 (10)                                                            | 15 (9)                                                             |
| PR status, No. (%)                                             |                           |                                                                    |                                                                    |
| Positive                                                       | 224 (61)                  | 202 (60)                                                           | 109 (64)                                                           |
| Negative                                                       | 81 (22)                   | 79 (23)                                                            | 31 (18)                                                            |
| Unknown                                                        | 63 (17)                   | 58 (17)                                                            | 31 (18)                                                            |
| Breast density, No. (%)                                        |                           |                                                                    |                                                                    |
| Almost entirely fat<br>(<25% fibroglandular)                   | 10 (3)                    | 8 (2)                                                              | 5 (3)                                                              |
| Scattered fibroglandular densities<br>(25%-50% fibroglandular) | 153 (42)                  | 143 (42)                                                           | 75 (44)                                                            |
| Heterogeneously dense<br>(51%-75% fibroglandular)              | 134 (36)                  | 123 (36)                                                           | 61 (36)                                                            |
| Extremely dense<br>(>75% fibroglandular)                       | 20 (5)                    | 17 (5)                                                             | 7 (4)                                                              |
| Not reported/Unknown                                           | 51 (14)                   | 48 (14)                                                            | 23 (13)                                                            |
| Longest diameter, median (IQR), mm                             | 11 (6, 20)                | 11 (6, 19.5)                                                       | 11 (6, 19)                                                         |
| Lesion type <sup>b</sup> , No. (%)                             |                           |                                                                    |                                                                    |
| Calcification(s)                                               | 305 (79)                  | 281 (79)                                                           | 145 (82)                                                           |
| Mass                                                           | 28 (7)                    | 24 (7)                                                             | 10 (6)                                                             |
| Asymmetry/Focal asymmetry                                      | 21 (5)                    | 19 (5)                                                             | 5 (3)                                                              |
| Architectural distortion                                       | 6 (2)                     | 6 (2)                                                              | 4 (2)                                                              |
| Other                                                          | 16 (4)                    | 16 (5)                                                             | 8 (5)                                                              |
| Not reported/Unknown                                           | 9 (2)                     | 8 (2)                                                              | 4 (2)                                                              |

Abbreviations: DCIS, ductal carcinoma in situ; ER, estrogen-receptor; IQR, interquartile range; MRI, magnetic resonance imaging; PR, progesterone-receptor.

<sup>a</sup> For one patient the DCIS grade was assessed as “Intermediate to high nuclear”. This is counted as High nuclear.

<sup>b</sup> 15/368 patients had multiple lesions reported on the diagnostic mammogram. Thus, the lesion type counts are greater than the number of patients in each column.
